# Supplementary material
Source: HighWire-hosted journal article supplement (https://erj.ersjournals.com/content/58/3/2100461)
Supplement: inline-supplementary-material-1 [file inline-supplementary-material-1.pdf]

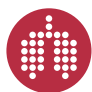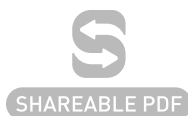

# Considerations of a real life pragmatic clinical trial in adolescent asthma

Tom Ruffles<sup>1</sup>, Brian Lipworth<sup>2</sup> and Somnath Mukhopadhyay<sup>1,3</sup> and , on behalf of the PACT study group

<sup>1</sup>Academic Dept of Paediatrics, Royal Alexandra Children's Hospital, Brighton and Sussex Medical School, Brighton, UK. <sup>2</sup>Scottish Centre for Respiratory Research, Ninewells Hospital and Medical School, University of Dundee, Dundee, UK. <sup>3</sup>Division of Population and Health Genomics, Ninewells Hospital and Medical School, University of Dundee, Dundee, UK.

Brian Lipworth (b.j.lipworth@dundee.ac.uk)

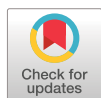

Shareable abstract (@ERSpublications)

**A pragmatic trial design was used to elucidate potential effects of genotype directed asthma prescribing in a real life primary care setting** <https://bit.ly/2PpYavS>

**Cite this article as:** Ruffles T, Lipworth B, Mukhopadhyay S. Considerations of a real life pragmatic clinical trial in adolescent asthma. *Eur Respir J* 2021; 58: 2100461 [DOI: 10.1183/13993003.00461-2021].

This single-page version can be shared freely online.

Copyright ©The authors 2021. For reproduction rights and permissions contact [permissions@ersnet.org](mailto:permissions@ersnet.org)

Received: 15 Feb 2021  
Accepted: 16 March 2021

*Reply to J.F.M. van Boven and co-workers:*
